# Supplementary material for: Structural Analysis of Human Fascin-1: Essential Protein for Actin Filaments Bundling
Source: MDPI journal article supplement (doi:10.3390/life12060843), 2022-06-06
Supplement: s1 [file s1]

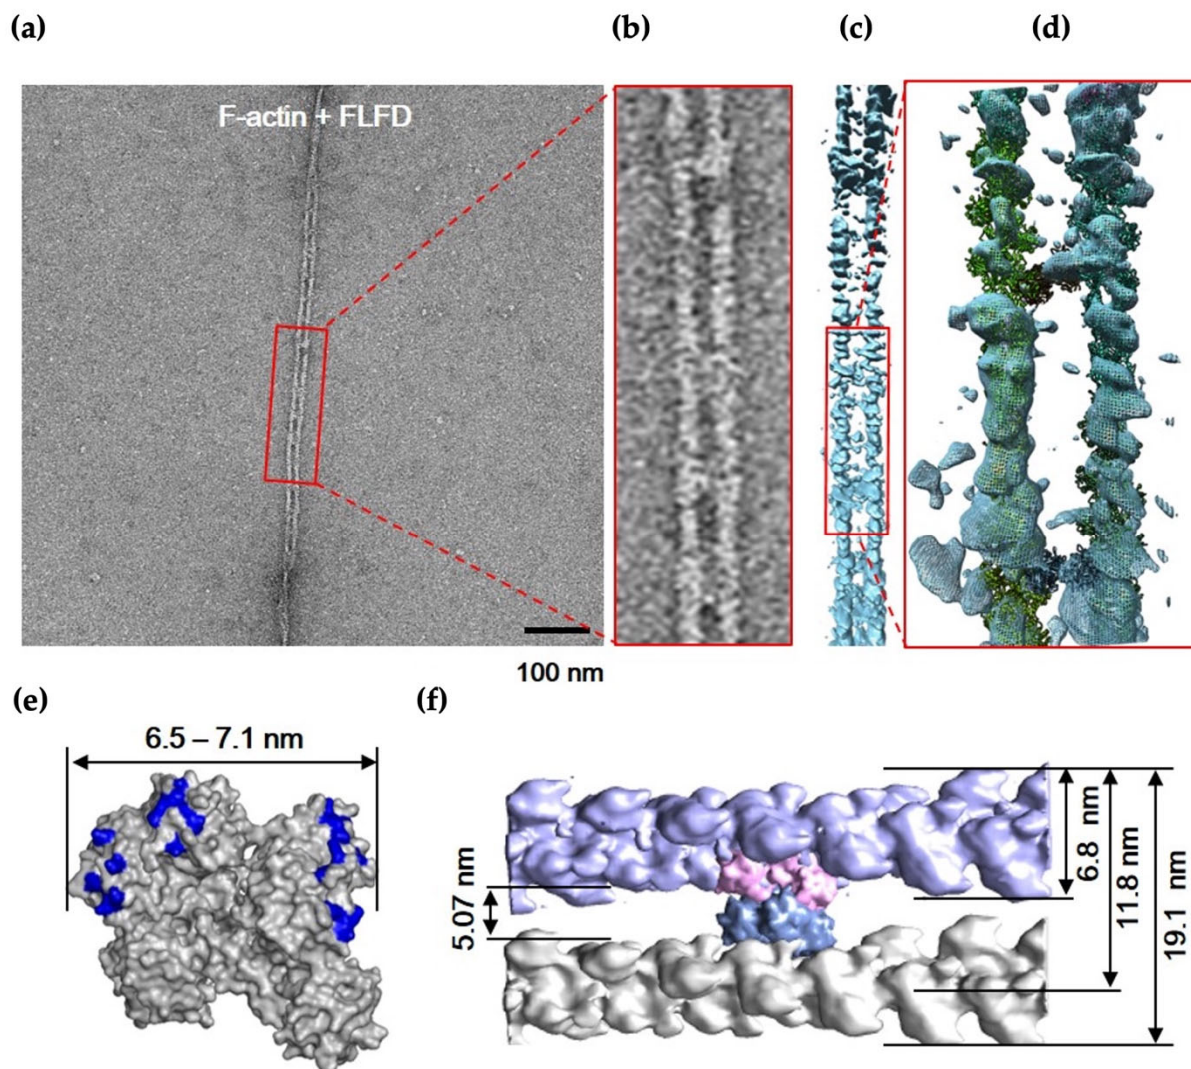

**Supplementary Figure S1. Actin bundling activity of  $\Delta$ hydrophobic interaction mutants.** (a) Negatively stained EM field of double stranded F-actin filament induced by FLF-dimer (FLFD). (b) Enlarged view of FLF-dimer decorated region. (c) Reconstructed 3D electron tomogram of double-stranded FLF-dimer/F-actin complex. (d) Superimposition of atomic structure of F-actin, 3D helical reconstruction model and FLF-dimer to the reconstructed 3D tomogram of FLF-dimer/F-actin complex. (e) Dimer model of fascin. The inter-molecular distance is indicated by two-head arrow. (f) Surface view of atomic model fitted to electron density map.
